# Supplementary material for: Characterization of various metal nanoparticles by graphite furnace atomic absorption spectrometry: possibilities and limitations with regard to size and shape
Source: Royal Society of Chemistry journal article supplement (doi:10.1039/d0ja00279h), 2020-01-01
Supplement: d0ja00279h1.pdf [file d0ja00279h1.pdf]

Table SI 1: Measurement conditions for the nanoparticle suspensions and corresponding ionic solutions.

| Element                        | Line (nm) | c(metal) ( $\mu\text{g L}^{-1}$ ) | V ( $\mu\text{L}$ ) | Device     | Platform       | Dosing   |
|--------------------------------|-----------|-----------------------------------|---------------------|------------|----------------|----------|
| Gold                           | 242       | 5                                 | 15                  | ContrAA600 | Solid Sampling | manually |
| Silver                         | 328       | 5                                 | 15                  | ContrAA600 | Solid Sampling | manually |
| Platinum                       | 265       | 50                                | 20                  | ContrAA600 | Integrated     | MPE 60   |
| Palladium                      | 244       | 5                                 | 20                  | ContrAA600 | Integrated     | manually |
| Iron                           | 248       | 20-50                             | 20                  | ContrAA600 | Integrated     | manually |
| Gold<br>$E_a$<br>determination | 242       | 5                                 | 20                  | NovAA800   | Integrated     | manually |

Table SI 2: Furnace temperature program for Au nanoparticle analysis with ContrAA660

| Step         | Temperature ( $^{\circ}\text{C}$ ) | Heating rate ( $^{\circ}\text{C s}^{-1}$ ) | Hold (s) |
|--------------|------------------------------------|--------------------------------------------|----------|
| Drying I     | 80                                 | 6                                          | 20       |
| Drying II    | 90                                 | 3                                          | 20       |
| Drying III   | 110                                | 5                                          | 20       |
| Drying IIII  | 120                                | 5                                          | 20       |
| Pyrolysis I  | 350                                | 50                                         | 20       |
| Pyrolysis II | 500                                | 300                                        | 10       |
| Auto-zero    | 500                                | 0                                          | 5        |
| Atomization  | 2200                               | 1500                                       | 5        |
| Cleaning     | 2450                               | 500                                        | 4        |

Table SI 3: Furnace temperature program for Au nanoparticle analysis with NovAA 800.

| Step         | Temperature ( $^{\circ}\text{C}$ ) | Heating rate ( $^{\circ}\text{C s}^{-1}$ ) | Hold (s) |
|--------------|------------------------------------|--------------------------------------------|----------|
| Drying I     | 80                                 | 6                                          | 20       |
| Drying II    | 90                                 | 3                                          | 20       |
| Drying III   | 110                                | 5                                          | 20       |
| Drying IV    | 120                                | 5                                          | 10       |
| Pyrolysis I  | 150                                | 50                                         | 10       |
| Pyrolysis II | 850                                | 700                                        | 1        |
| Auto-zero    | 850                                | 0                                          | 6        |
| Atomization  | 2200                               | 250                                        | 0        |
| Cleaning     | 2450                               | 500                                        | 4        |

Table SI 4: Furnace temperature program for Ag analysis.

| Step         | Temperature ( $^{\circ}\text{C}$ ) | Heating rate ( $^{\circ}\text{C s}^{-1}$ ) | Hold (s) |
|--------------|------------------------------------|--------------------------------------------|----------|
| Drying I     | 80                                 | 6                                          | 20       |
| Drying II    | 90                                 | 3                                          | 20       |
| Drying III   | 110                                | 5                                          | 20       |
| Drying IIII  | 120                                | 5                                          | 20       |
| Pyrolysis I  | 350                                | 50                                         | 20       |
| Pyrolysis II | 400                                | 300                                        | 10       |

|             |      |      |   |
|-------------|------|------|---|
| Auto-zero   | 400  | 0    | 5 |
| Atomization | 1800 | 1500 | 3 |
| Cleaning    | 2450 | 500  | 4 |

Table SI 5: Furnace temperature program for Pt analysis.

| Step         | Temperature (°C) | Heating rate (°C s <sup>-1</sup> ) | Hold (s) |
|--------------|------------------|------------------------------------|----------|
| Drying I     | 80               | 6                                  | 20       |
| Drying II    | 90               | 3                                  | 20       |
| Drying III   | 110              | 5                                  | 10       |
| Pyrolysis I  | 350              | 50                                 | 20       |
| Pyrolysis II | 1300             | 300                                | 10       |
| Auto-zero    | 1300             | 0                                  | 5        |
| Atomization  | 2400/2400/2200   | 1500/500/1500                      | 6        |
| Cleaning     | 2500             | 500                                | 4        |

Table SI 6: Furnace temperature program for Pd analysis.

| Step         | Temperature (°C) | Heating rate (°C s <sup>-1</sup> ) | Hold (s) |
|--------------|------------------|------------------------------------|----------|
| Drying I     | 80               | 6                                  | 20       |
| Drying II    | 90               | 3                                  | 20       |
| Drying III   | 110              | 5                                  | 10       |
| Pyrolysis I  | 350              | 50                                 | 20       |
| Pyrolysis II | 950              | 300                                | 10       |
| Auto-zero    | 950              | 0                                  | 5        |
| Atomization  | 2400/2400/2200   | 1500/250/1500                      | 6        |
| Cleaning     | 2450             | 500                                | 4        |

Table SI 7: Furnace temperature program for Fe analysis.

| Step         | Temperature (°C) | Heating rate (°C s <sup>-1</sup> ) | Hold (s) |
|--------------|------------------|------------------------------------|----------|
| Drying I     | 80               | 6                                  | 20       |
| Drying II    | 90               | 3                                  | 20       |
| Drying III   | 110              | 5                                  | 10       |
| Pyrolysis I  | 350              | 50                                 | 20       |
| Pyrolysis II | 950              | 300                                | 10       |
| Auto-zero    | 950              | 0                                  | 5        |
| Atomization  | 2100             | 1500                               | 8        |
| Cleaning     | 2450             | 500                                | 4        |

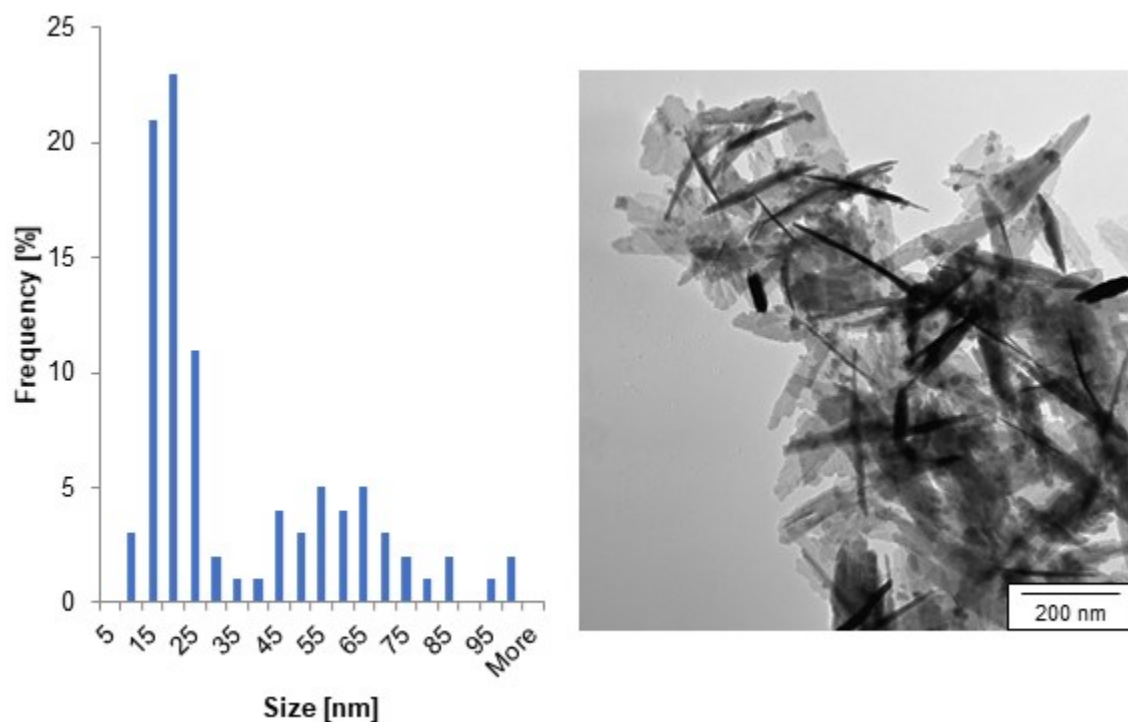

Figure SI 1: Size distribution of nZVI and exemplary TEM image ( $n = 94$ ).

Table SI 8: Potential depth parameter of Lennard-Jones potential for interaction between metal and carbon. Displayed parameters were calculated with Lorenzt-Berthold (LB) rule<sup>1-3</sup> and found in literature.

| Compound    | Potential depth $\epsilon$ (eV) |                               |
|-------------|---------------------------------|-------------------------------|
|             | Calculated by LB rule           | Found in literature           |
| <b>Ag-C</b> | 0.0291                          | 0.0301 <sup>4,5</sup>         |
| <b>Au-C</b> | 0.0332                          | 0.01273-0.0341 <sup>5-8</sup> |
| <b>Pd-C</b> | 0.0335                          | 0.0335-0.03444 <sup>8,9</sup> |
| <b>Fe-C</b> | 0.0357                          | 0.02495 <sup>10,11</sup>      |
| <b>Pt-C</b> | 0.0409                          | 0.04092 <sup>8,12</sup>       |

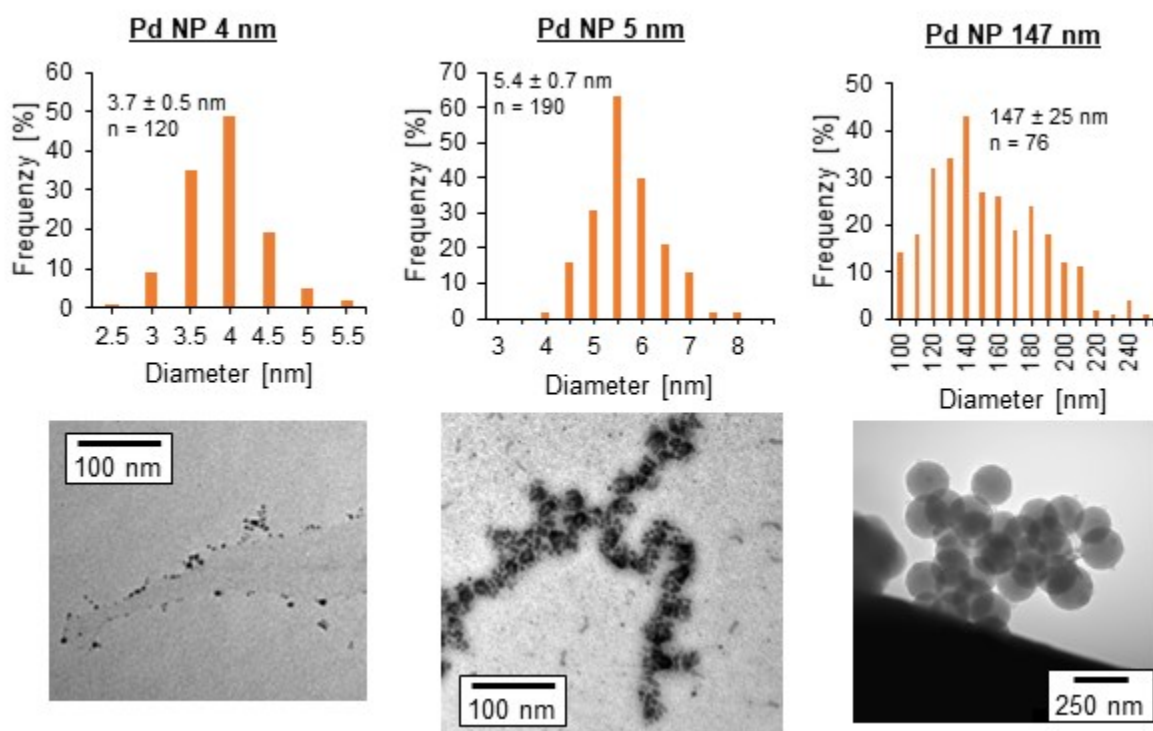

Figure SI 2. Exemplary TEM images and size distributions of synthesized Pd NPs.

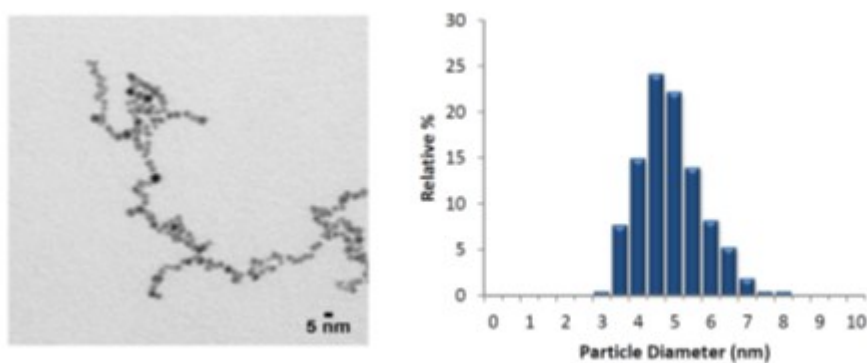

Figure SI 3: Exemplary TEM image and size distribution of Pt NP sized 5 nm. Data were provided as certificate of analysis by the manufacturer.

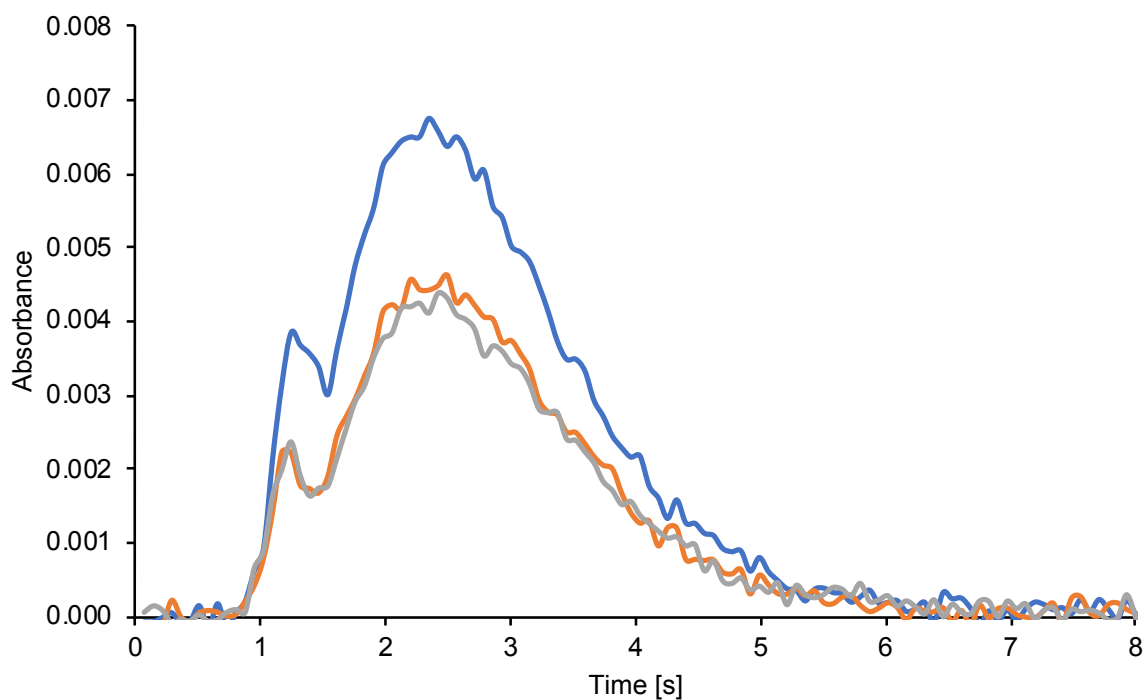

Figure SI 4: Absorbance signal of ionic Pd (blue), Pd NP 4 nm (orange) and Pd NP 150 nm (grey) atomized in the presence of ruthenium modifier.

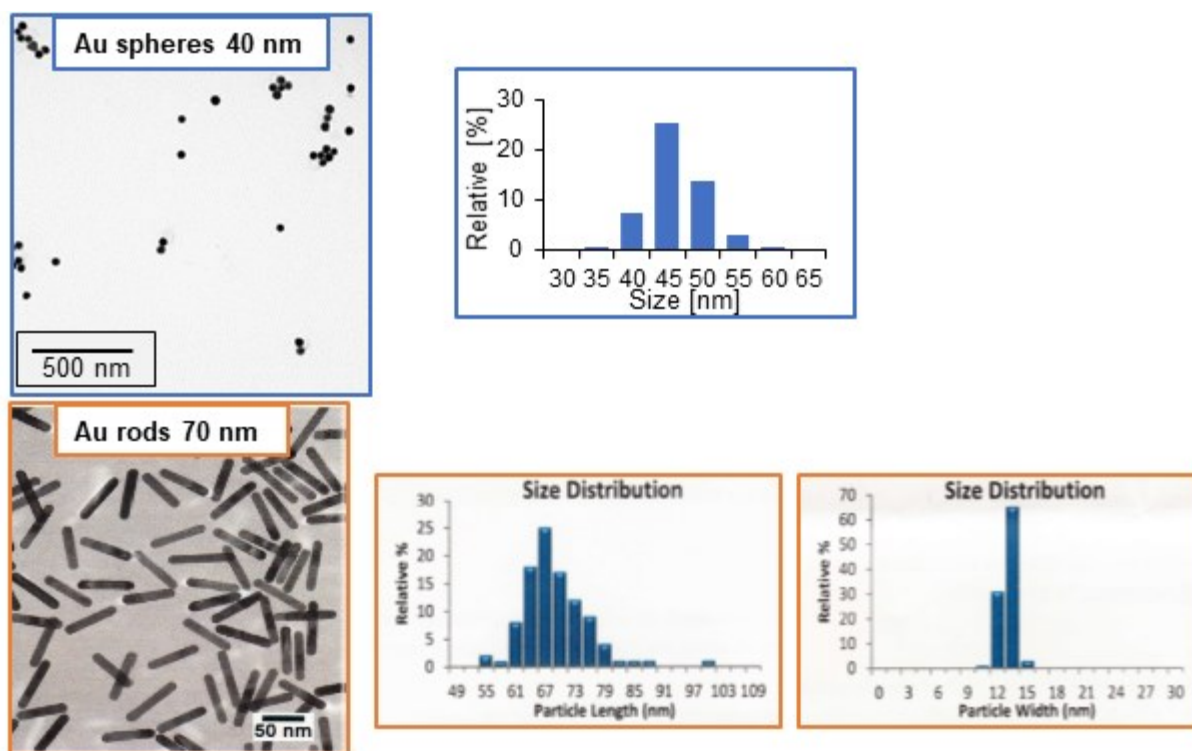

Figure SI 5: Exemplary TEM images and size distribution of Au spheres and Au rods. Data for Au rods were provided as certificate of analysis by the manufacturer, while data for Au spheres were measured by TEM.

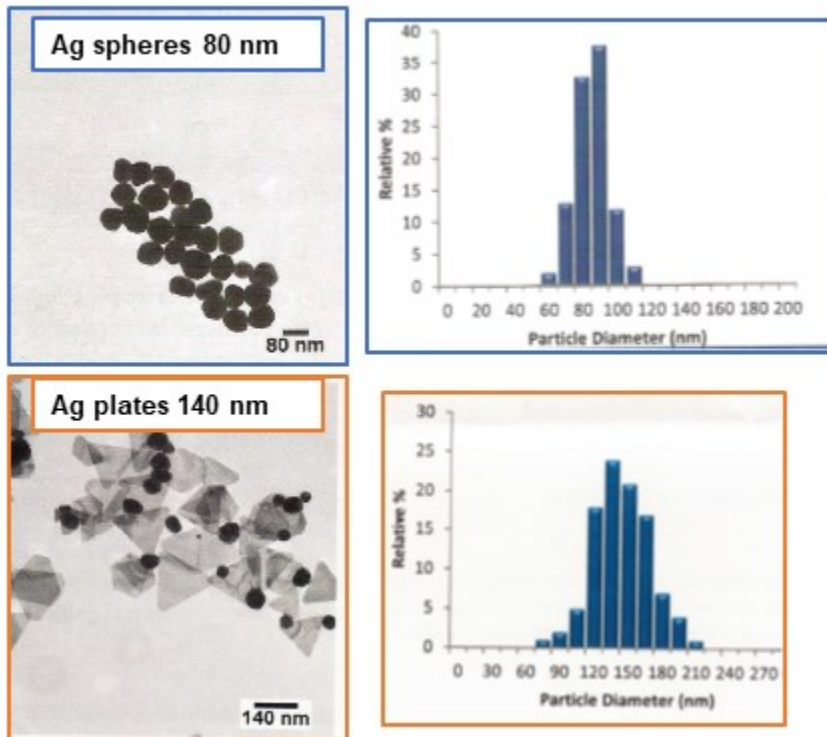

Figure SI 6: Exemplary TEM images and size distribution of Ag spheres and Ag plates. Data were provided as certificate of analysis by the manufacturer.

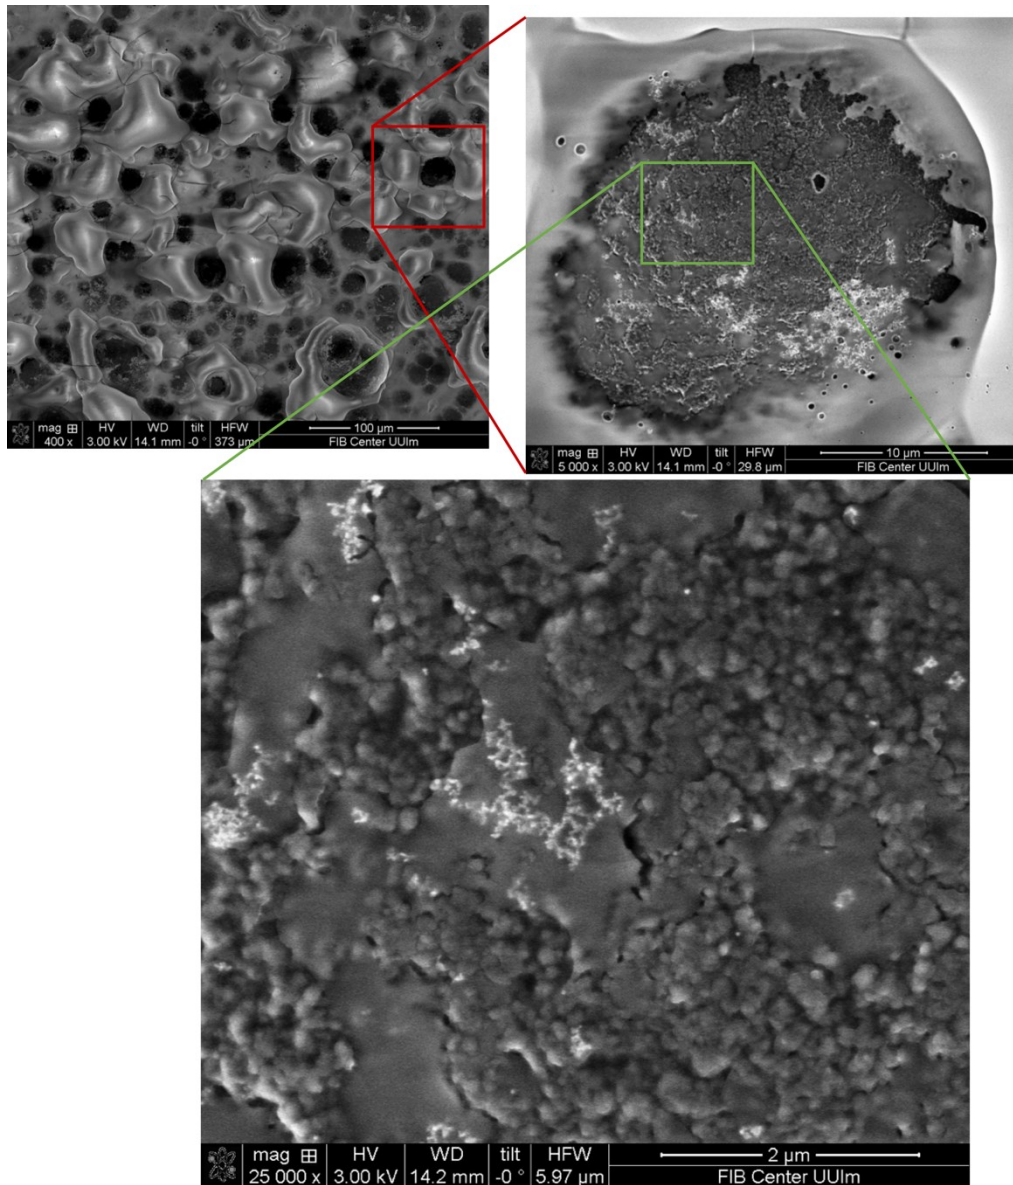

Figure SI 7: Exemplary SEM images of Ag Plates 32 nm on solid sampler graphite platform.

a) Au rods in UPW

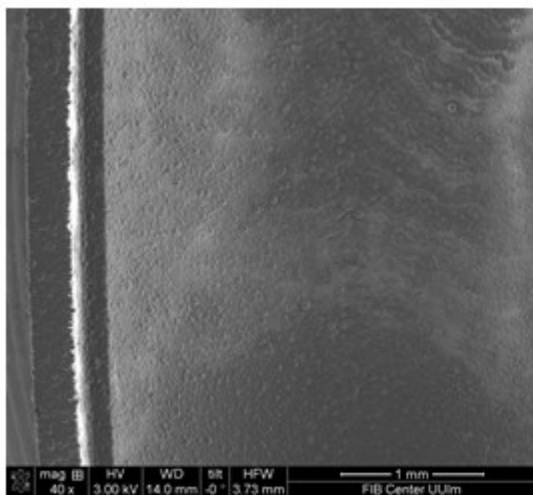

b) Ag plates in aq. sodium borate

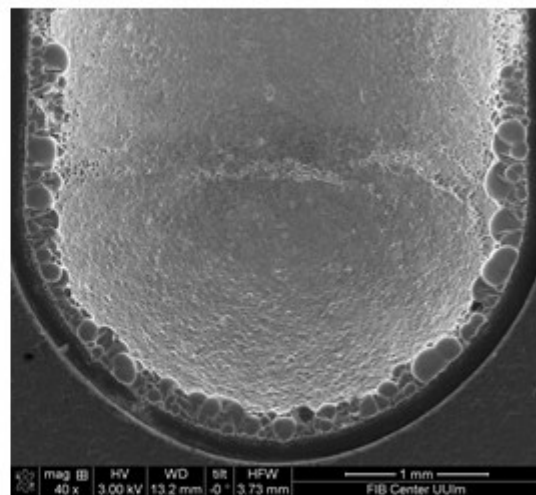

Figure SI 8: Exemplary SEM images of graphite platform with a) Au rods stored in UPW and b) Ag plates stored in aqueous 5 mM sodium borate. In Figure b) the crystallized sodium borate is visible.

#### Literature:

- 1 P. M. Agrawal, B. M. Rice and D. L. Thompson, *Surface Science*, 2002, **515**, 21–35.
- 2 L. Miao, V. R. Bhethanabotla and B. Joseph, *AIChE Annual Meeting, Conference Proceeding*, 2004, 2453–2460.
- 3 L. Xie, P. Brault, A.-L. Thomann and J.-M. Bauchire, *Applied Surface Science*, 2013, **285**, 810–816.
- 4 H. Akbarzadeh and H. Yaghoubi, *Journal of Colloid and Interface Science*, 2014, **418**, 178–184.
- 5 M. Neek-Amal, R. Asgari and M. R. R. Tabar, *Nanotechnology*, 2009, **20**, 135602.
- 6 C. H. Claassens, J. J. Terblans, M. J. H. Hoffman and H. C. Swart, *Surface and Interface Analysis*, 2005, **37**, 1021–1026.
- 7 W. D. Luedtke and U. Landman, *Phys. Rev. Lett.*, 1999, **82**, 3835–3838.
- 8 H. Wei, S. Wei, X. Zhu and X. Lu, *J. Phys. Chem. C*, 2017, **121**, 12911–12920.
- 9 D. Schebarchov, S. C. Hendy and W. Polak, *J. Phys.: Condens. Matter*, 2009, **21**, 144204.
- 10 Y. Yin, W. Li, H. Shen, J. Zhou, H. Nan, M. Deng, X. Shen and Z. Tu, *ISIJ International*, 2018, **58**, 1022–1027.
- 11 J. P. Ewen, C. Gattinoni, F. M. Thakkar, N. Morgan, H. A. Spikes and D. Dini, *Tribol Lett*, 2016, **63**, 38.
- 12 D. Cheng, W. Wang and S. Huang, *J. Phys. Chem. C*, 2007, **111**, 1631–1637.
